# Supplementary material for: Free-Standing and Self-Crosslinkable Hybrid Films by Core–Shell Particle Design and Processing
Source: MDPI journal article supplement (doi:10.3390/nano7110390), 2017-11-15
Supplement: s1 [file s1]

# Free-Standing and Self-Crosslinkable Hybrid Films by Core-Shell Particle Design and Processing

Steffen Vowinkel <sup>1</sup>, Stephen Paul <sup>2</sup>, Torsten Gutmann <sup>2</sup> and Markus Gallei <sup>1,\*</sup>

Supporting Information

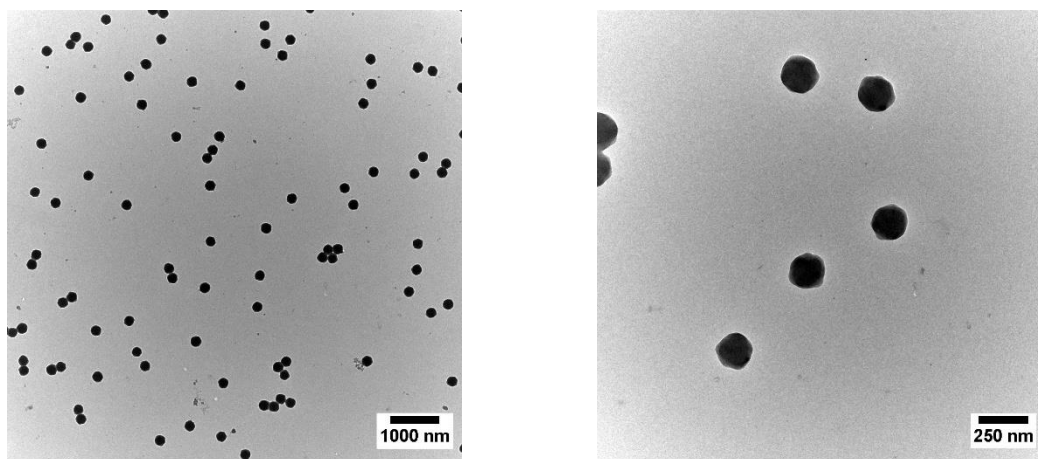

**Figure S1.** TEM Images of P(MMA-*co*-ALMA)@P(EA-*co*-MPSIsoprop) particles.

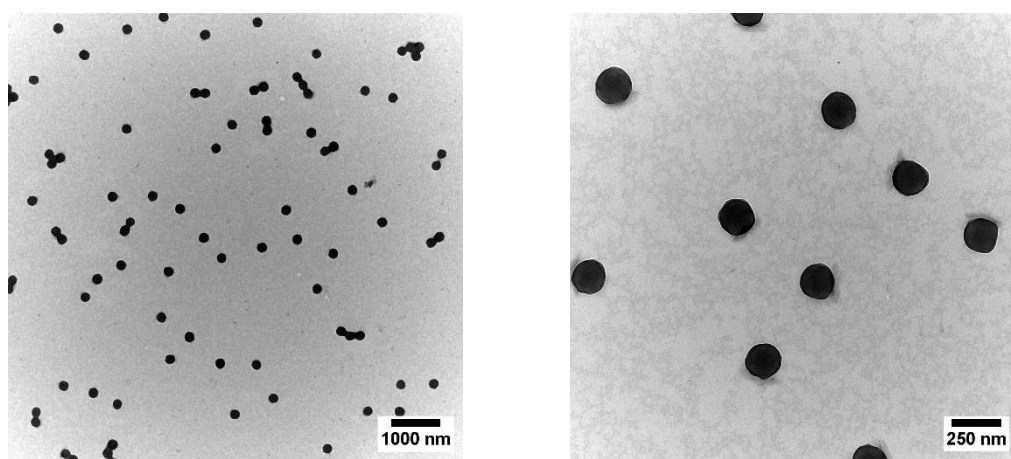

**Figure S2.** TEM Images of P(MMA-*co*-ALMA)@P(EA-*co*-MPSMeEt) particles.

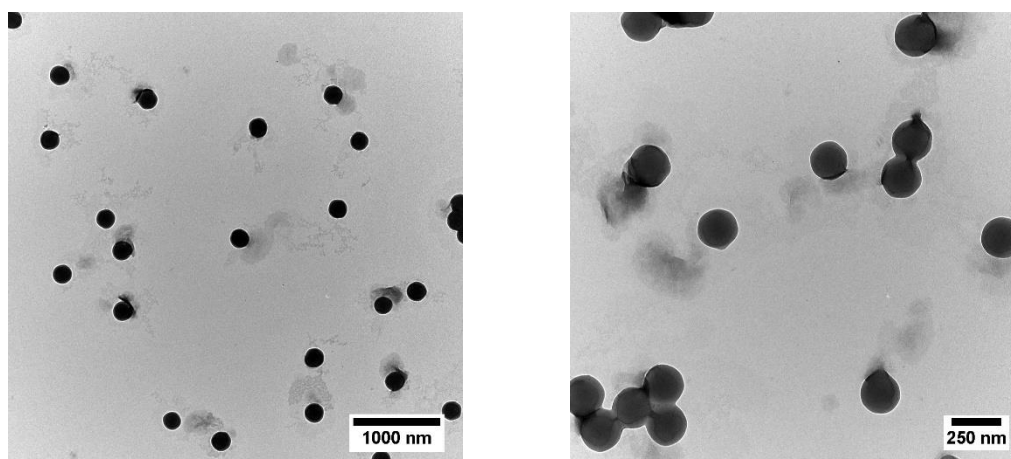

**Figure S3.** TEM Images of P(S-*co*-ALMA)@P(EA-*co*-MPSEt) particles - 230 nm (DLS).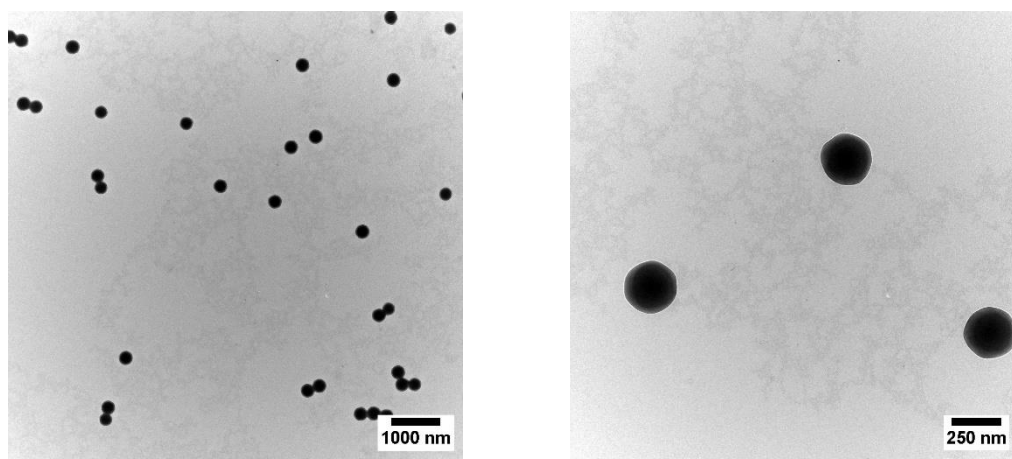**Figure S4.** TEM Images of P(S-*co*-ALMA)@P(EA-*co*-MPSEt) particles - 289 nm (DLS).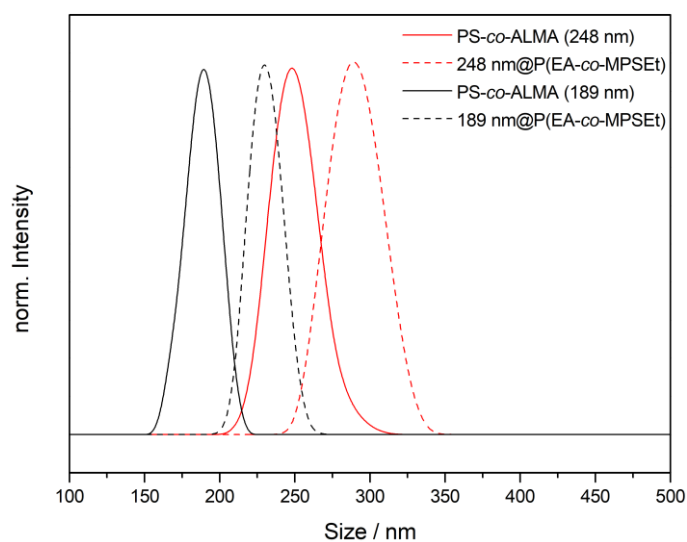**Figure S5.** DLS measurement of different sized P(S-*co*-ALMA) particles with corresponding shell of P(EA-*co*-MPSEt).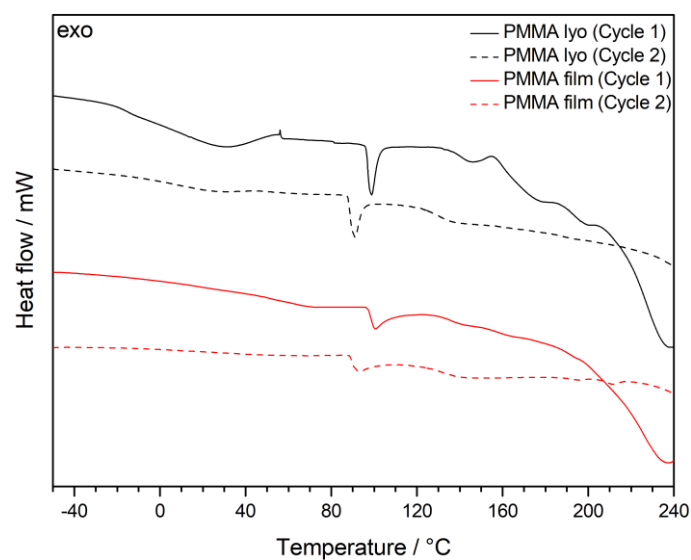

**Figure S6.** DSC measurement of P(MMA-*co*-ALMA)@P(EA-*co*-MPSEt) lyophilized particle powder in comparison with the film after melt-shear organization with a heating rate of 5 K min<sup>-1</sup> under nitrogen atmosphere.

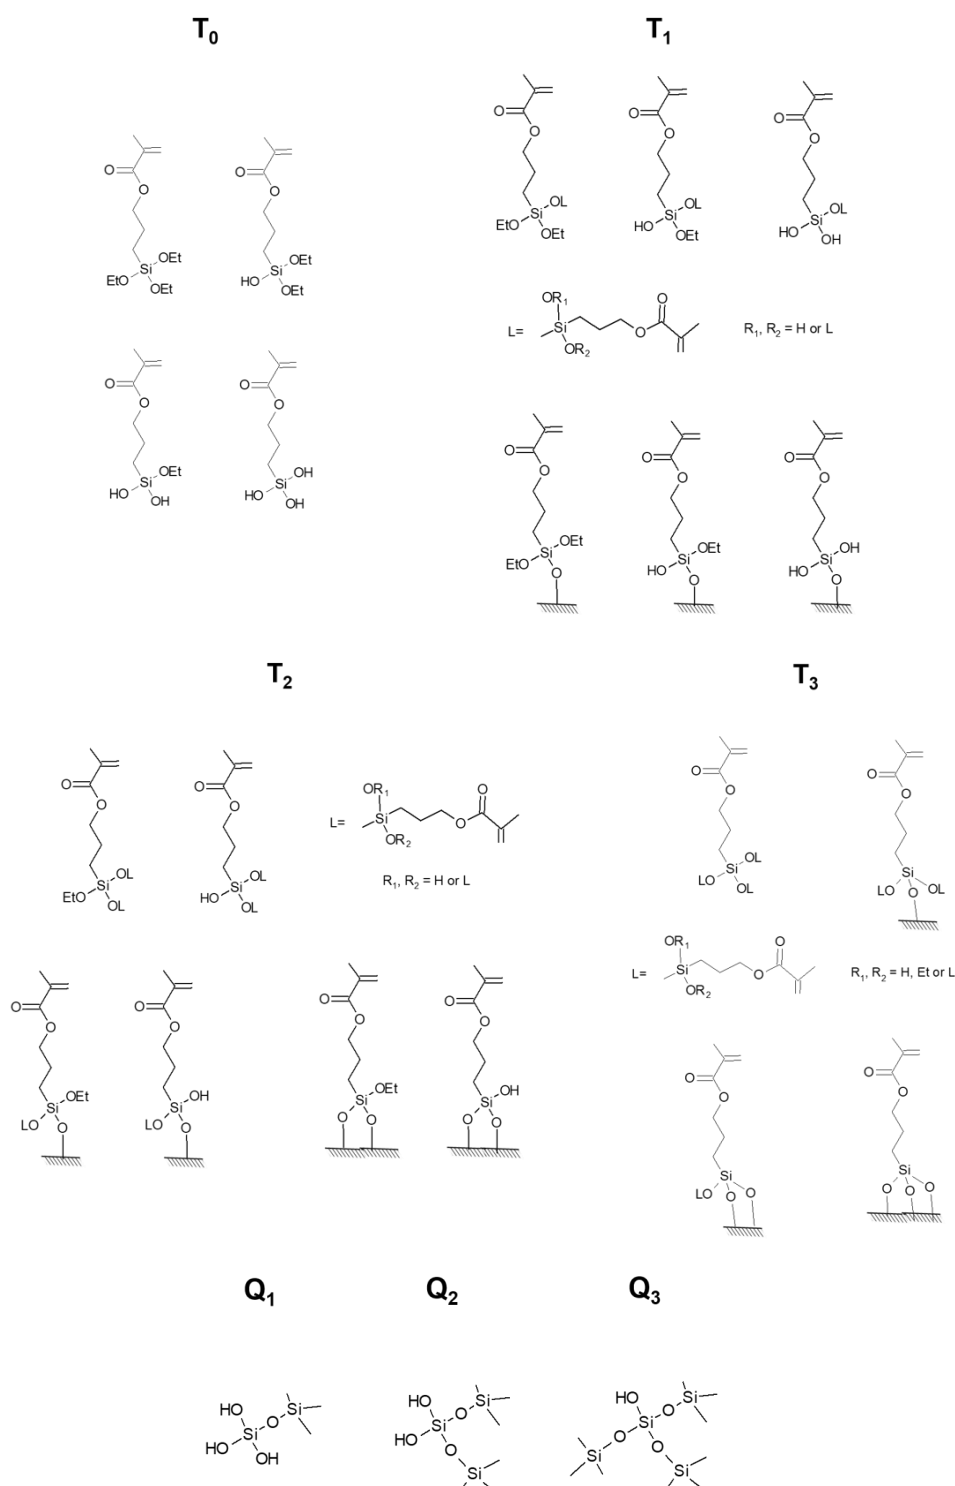

**Figure S7.** Possibilities of cross-linking of the 3-methacryloxypropyltriethoxysilane (MPSEt) linker indicated by T<sub>n</sub> groups (n=0, 1, 2, 3) in the <sup>29</sup>Si CP MAS spectra. Note that cross-linking between different linker molecules L is more probable than the binding to bulk silica. The obtained bulk silica indicated by Q<sub>n</sub> groups (n= 1, 2, 3) in the <sup>29</sup>Si CP MAS spectra is assumed to be formed by decomposition of the organic silane linker.

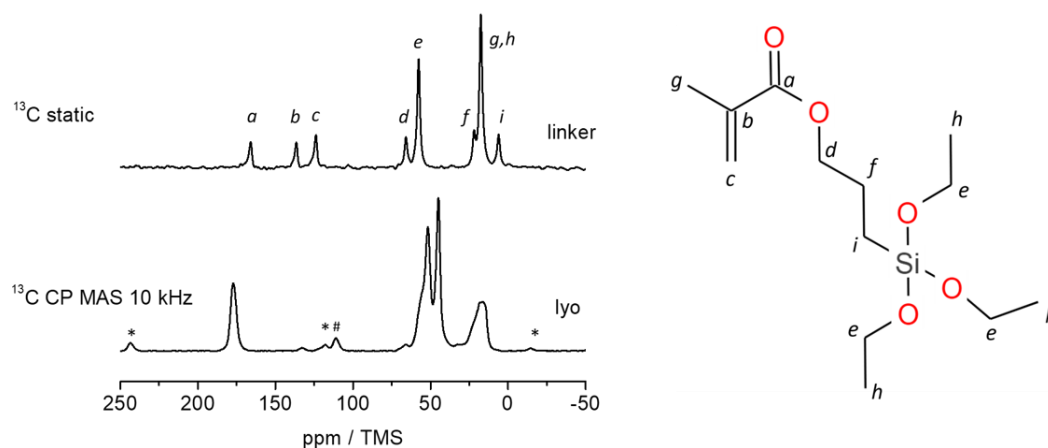

**Figure S8.**  $^{13}\text{C}$  static spectrum of the free linker MPSEt with signal assignments, and corresponding  $^{13}\text{C}$  CP MAS spectrum measured at 10 kHz spinning of the lyophilized powder sample prepared with this linker.

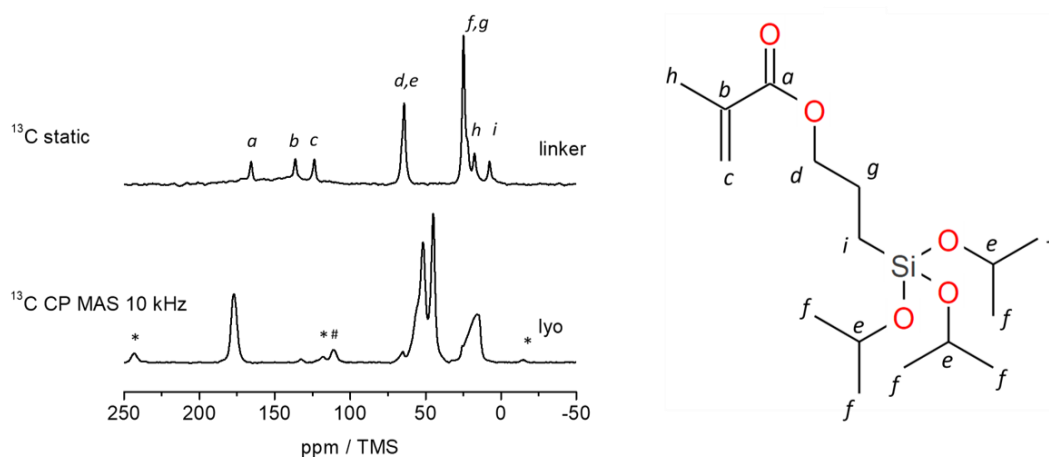

**Figure S9.**  $^{13}\text{C}$  static spectrum of the free linker MPSIsoprop with signal assignments, and corresponding  $^{13}\text{C}$  CP MAS spectrum measured at 10 kHz spinning of the lyophilized powder sample prepared with this linker.

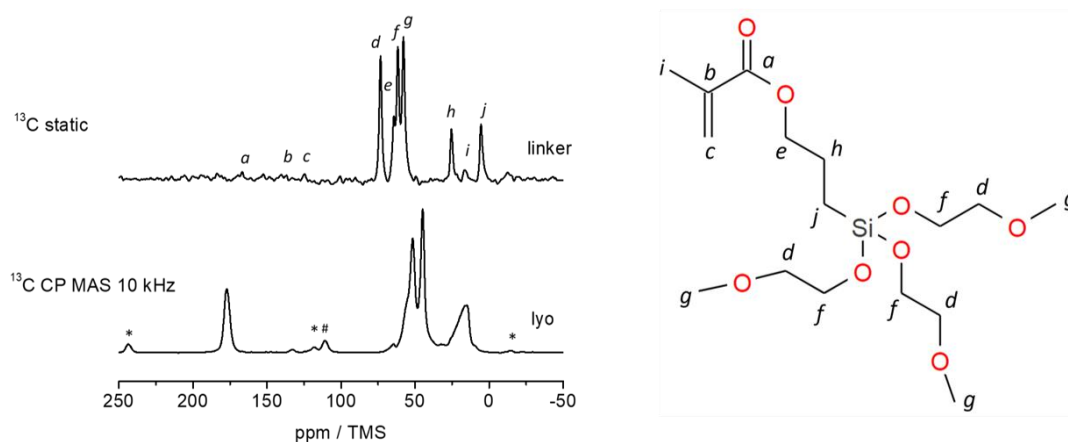

**Figure S10.**  $^{13}\text{C}$  static spectrum of the free linker MPSMeEt with signal assignments, and corresponding  $^{13}\text{C}$  CP MAS spectrum measured at 10 kHz spinning of the lyophilized powder sample prepared with this linker.

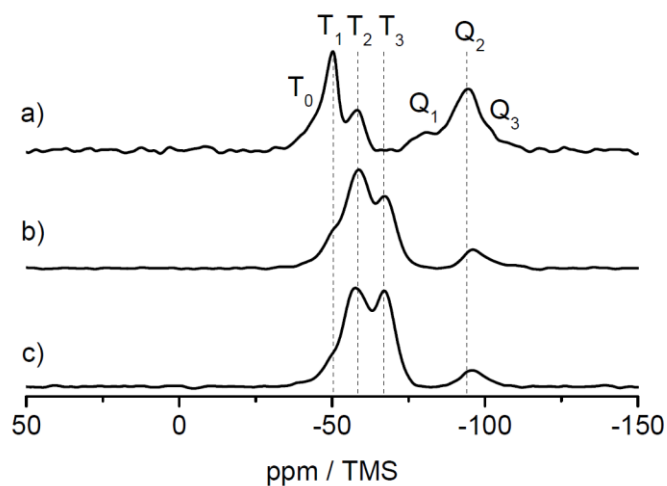

**Figure S11.**  $^{29}\text{Si}$  CP MAS spectra of samples based on the MPSIsoprop linker system in three different states: (a) lyophilized powder, (b) hybrid film and (c) hybrid film after heat treatment, and signal assignment of  $T_n$  groups ( $n=0,1,2,3$ ) and  $Q_n$  groups ( $n=1,2,3$ ). Spectra were measured at 14 T at a spinning rate of 8 kHz.

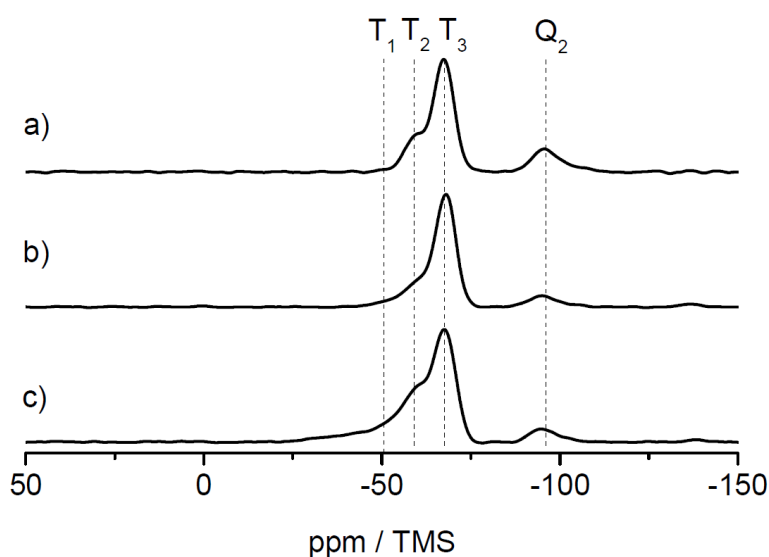

**Figure S12.**  $^{29}\text{Si}$  CP MAS spectra of samples based on the MPSMeEt linker system in three different states: (a) lyophilized powder, (b) hybrid film and (c) hybrid film after heat treatment, and signal assignment of  $T_n$  groups ( $n=0,1,2,3$ ) and  $Q_n$  groups ( $n=1,2,3$ ). Spectra were measured at 14 T at a spinning rate of 8 kHz.

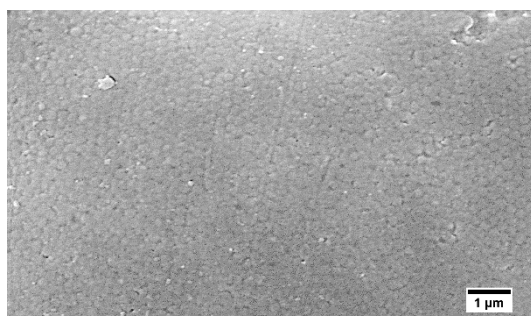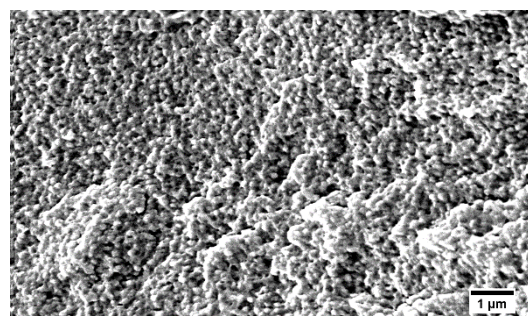



**Figure S13.** SEM images of the surface (left) and cross-section (right) of the P(MMA-*co*-ALMA)@P(EA-*co*-MPSEt) film after processing at 140°C and 180 bar for 3 minutes.

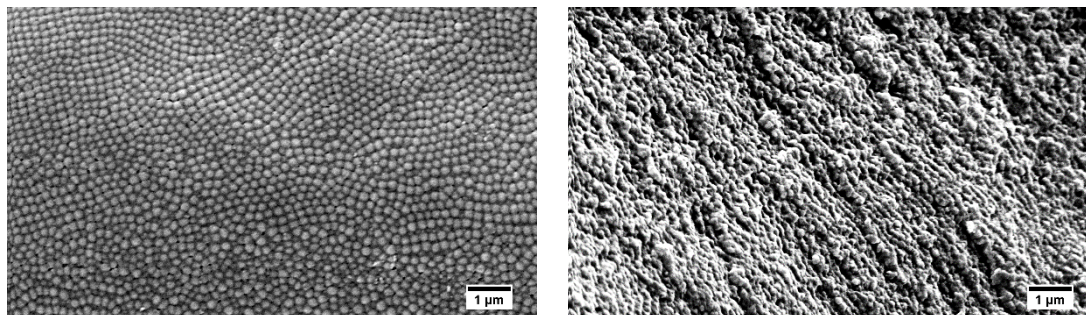

**Figure S14.** SEM images of the surface (left) and cross-section (right) of the P(MMA-*co*-ALMA)@P(EA-*co*-MPSIsoprop) film after processing at 140 °C and 180 bar for 3 minutes.

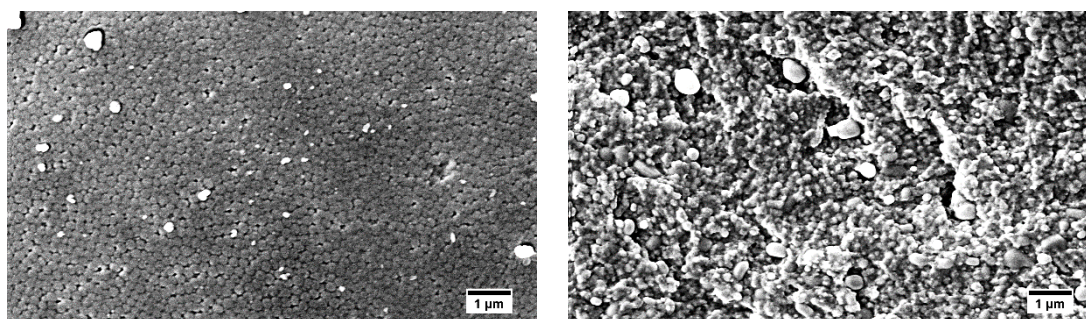

**Figure 15.** SEM images of the surface (left) and cross-section (right) of the P(MMA-*co*-ALMA)@P(EA-*co*-MPSMeEt) film after processing at 140 °C and 180 bar for 3 minutes.
